# Supplementary material for: Effects of Montmorillonite on the Mineralization and Cementing Properties of Microbiologically Induced Calcium Carbonate
Source: Hindawi journal article supplement (doi:10.1155/2017/7874251), 2017-01-01
Supplement: f1 [file 7874251.f1.docx]

**Effects of montmorillonite on the mineralization and cementing properties of microbiologically induced calcium carbonate**

**Tao Chen****1,** **Jiwei li1, Peiheng Shi2,** **Yi Li1,** **Jia Lei2,** **Jian Zhou2,** **Zuowen Hu3,** **Tao Duan1,** **Yongjian Tang2,** **Wenkun Zhu1,2***

*1Nuclear Waste and Environmental Safety Key Laboratory of Defense, Southwest University of Science and Technology,* *Mianyang 621010, China.*

*2* *Sichuan Civil- military Integration Institute,* *Sichuan Mianyang 621010, P.R. China.*

*3**China Academy of Engineering Physics, Mianyang 621000, China.*

* Correspondence: zhuwenkun@swust.edu.cn (W.Z.); Tel.: +86-816-608-9883

**Supporting Information**

**1. CaCO3 Crystals Growing in the Presence of MMT**

It can be seen from Fig. S1 that the mineralized sample with montmorillonite is formed by a piece of calcium carbonate crystal sheet.


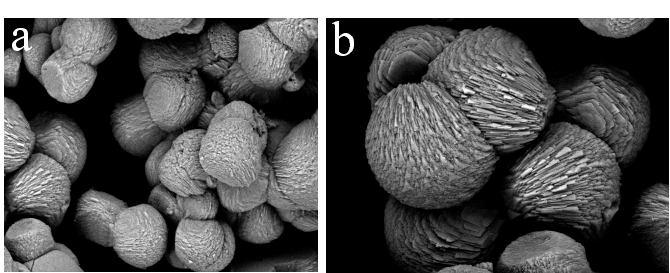


**Figure S1.** Typical SEM images of Mineralized samples of montmorillonite

It can be seen from Figure S2 that the change of pH value of mineralized solution without montmorillonite is obviously larger than that mineralized solution with montmorillonite. The mineralization solution without montmorillonite was 9.4 at the time of mineralization time of 60 hours, and the mineralization solution with montmorillonite was 9.1, which indicated that montmorillonite have the effect of buffering acidity.

**2. Change of pH in the mineralization solution**

Figure S2.Change of pH in the mineralization solution

**3. Changes in the number of bacteria in the mineralization solution**

From the figure S3 we can see that montmorillonite has a certain effect on the growth of bacteria, uranium tailings have a certain inhibitory effect on bacteria, in addition montmorillonite can reduce the toxicity of uranium tailings on bacteria.

**Figure S3.** Effects of Different Additives on Bacterial Growth
